## Prevalence of indications of alcohol and drug use among patients treated for injurious falls by Emergency Medical Services

Nicole G. Itzkowitz<sup>1</sup>, Kathryn G. Burford<sup>2</sup>, Remle P. Crowe<sup>3</sup>, Henry E. Wang<sup>4</sup>, Alexander X. Lo<sup>5,6</sup>, Andrew G. Rundle<sup>1</sup>

- 1 Department of Epidemiology, Columbia University Mailman School of Public Health, New York, NY, 10032, USA.
- 2 Department of Environmental Health Sciences, Columbia University Mailman School of Public Health, New York, NY, 10032, USA.
- 3 ESO Solutions LLC, Austin, TX, USA.
- 4 Department of Emergency Medicine, Wexner Medical Center, Ohio State University, Columbus, OH, USA.
- 5 Department of Emergency Medicine, Northwestern University Feinberg School of Medicine, Chicago, IL, USA.
- 6 Center for Health Services & Outcomes Research, Northwestern University Feinberg School of Medicine, Chicago, IL, USA.

### Corresponding Author:

Nicole G. Itzkowitz

Department of Epidemiology, Columbia University Mailman School of Public Health, New York, NY, 10032, USA.

Email: [ni2267@cumc.columbia.edu](mailto:ni2267@cumc.columbia.edu)

### Abstract

**Objective:** To describe the distribution of alcohol and drug involvement in injurious falls by location and subtype of fall.

**Methods:** Using the 2019 National Emergency Medical Services Information System (NEMSIS) dataset we identified 1,854,909 patients injured from falls requiring an Emergency Medical Services (EMS) response and determined the fall location (e.g. indoors or on street/sidewalk) and the EMS clinician's notation of alcohol or drug involvement. We analyzed substance involvement by fall subtype, location of fall and patient demographics.

**Results:** Overall, for 7.4% of injurious falls there was a notation of substance use: 6.5% for alcohol alone, 0.6% for drugs and 0.3% for alcohol and drugs. 21.2% of falls that occurred on a street or sidewalk had a notation of substance use; alcohol use alone for 18.5% of falls, drugs alone for 1.7% of falls and alcohol and drugs for 0.9% of falls. Substance use prevalence was highest, at 30.3%, in the age group 21 to 64 years, for falls occurring on streets and sidewalks, without syncope or heat illness as contributing factors; alcohol use alone for 26.3%, drugs alone for 2.6%, and alcohol and drugs for 1.4%. Reported substance use involvement was more frequent for men compared to women for each location type.

**Conclusions:** Overall, 1-in-5 injurious falls on streets and sidewalks and requiring EMS attention involved substance use, and these numbers likely underestimate the true burden. As cities seek to expand nightlife districts, design strategies to protect pedestrians from falls should be enacted.

## Introduction

The association between alcohol consumption and increased injuries from falls is well established. (1-5) A recent systematic review of substance use among falls patients recommended that research address the prevalence of substance use by fall type and the prevalence of drug use as well as alcohol use. (6) Prior studies have rarely distinguished between falls that occur in the home and falls that occur outdoors, and particularly those occurring on streets and sidewalks. (7) This distinction is important because current fall prevention guidelines focus on indoor falls and not on falls occurring outdoors. (8-11) However, there are policy tools, such as stricter enforcement of existing licensing laws, that can be used to influence the extent of alcohol consumption in public spaces, bars and restaurants and that can be used to improve outdoor pedestrian safety environments around bars and restaurants and in nightlife districts. (12)

It has been estimated that over 500,000 falls requiring at least some form of medical attention occur on streets and sidewalks annually. (13) To our knowledge national or regional estimates of the number of alcohol and/or drug involved injurious falls that occur on streets and sidewalks do not exist. However, data on the number of pedestrians under the influence of alcohol who are injured or killed by motor vehicles suggest that pedestrians under the influence of alcohol constitute a significant portion of vulnerable road users. (14-16) The National Highway Traffic Safety Administration (NHTSA) reported that 31% of pedestrians who were killed in a traffic crash had a BAC of 0.08 g/dL or higher in 2019. As such, it is likely that a large number of injurious falls occurring outdoors involve pedestrians who are alcohol impaired.

The only extant public health messaging on substance use by pedestrians comes from the NHTSA which simply advises pedestrians to “avoid alcohol and drugs when walking; they impair your judgment and coordination”. (16, 17) The most recent set of policy and design recommendations for reducing injuries among intoxicated pedestrians was a 1996 report from Monash University. (18) This is a concern because many cities, as part of economic development plans to revitalize urban centers, are now developing and promoting nightlife and nightlife districts, prominently featuring alcohol-serving establishments, which encourage patrons to walk between nearby alcohol serving venues. (19-22) In addition, nightlife districts and the nighttime economy are also associated with illicit drug use. (23-25) Furthermore, multiple jurisdictions have open container laws, that allow drinking on streets and sidewalks, and to-go alcohol purchases, policies that also encourage walking and drinking. (20, 26, 27) Additionally, multiple states have legalized or decriminalized cannabis and within these states retail outlets selling cannabis have proliferated, with some allowing on-site consumption, and use of cannabis in public spaces is becoming common. (28-31) These economic and policy initiatives are likely to increase the number of pedestrians under the influence of alcohol and at risk of falls and injuries from motor vehicles. (12, 20, 32, 33)

To support advances in polices and urban design strategies to prevent pedestrian falls, there is a need for data describing the burden of alcohol and drug-related injurious falls (6). As an initial effort to describe this burden, we used the 2019 National Emergency Medical Services Information System (NEMSIS) public-use research dataset to assess the prevalence of indicators

for substance use among patients treated for injurious falls by Emergency Medical Services (EMS).

## **Methods**

### ***Study design and setting***

This cross-sectional study of EMS records from the 2019 National Emergency Medical Services Information System (NEMSIS) Public-Release Research Dataset included 1,854,909 occurrences of falls requiring EMS response across US states and territories. (7)

### ***Data source***

NEMSIS is the national system to collect and standardize data from EMS agencies across the US. The National Highway Traffic Safety Administration Office for Emergency Medical Services provides the NEMSIS data as a public use, de-identified, Health Insurance Portability and Accountability Act exempt dataset hosted by the University of Utah, therefore further institutional review board (IRB) review was not requested. (<https://nemsis.org/using-ems-data/>). (34-36) The use of NEMSIS to identify falls and locations of falls have been previously described and includes a robust approach to identifying overall injurious falls and to identifying falls for which syncope (heat-related and non-heat related syncope) and heat illness were contributing factors. (7) All EMS data entry into NEMSIS must abide by the standards set forth by the NHTSA Office of EMS and outlined in the NEMSIS data dictionary ([https://nemsis.org/media/nemsis\\_v3/release-3.5.0/DataDictionary/PDFHTML/EMSDEMSTATE/index.html](https://nemsis.org/media/nemsis_v3/release-3.5.0/DataDictionary/PDFHTML/EMSDEMSTATE/index.html)). Falls with EMS notations of seizures have been removed from the analyses.

### ***Variable coding***

#### ***Sociodemographic data***

The NEMSIS variables ePatient.13 and ePatient.15 were used to define patient sex (male, female) and age group (0-20, 21-50, 50-64 and 65+), respectively.

#### ***Alcohol and drug use data***

The NEMSIS variable eHistory.17 contains data on the EMS clinician's evaluation of whether alcohol or drugs were involved in an incident. Using these data patients were classified for the EMS clinician's notation of evidence of: "alcohol use", "drug use", or "alcohol and drug use". In the absence of a positive notation of substance use in the eHistory.17 variable, patients were classified as "evidence of substance use not noted". The eHistory.17 variable includes multiple codes for each patient. Codes for the eHistory.17 variable of: 3117001, 3117005, 3117011, 3117009 were used to define "alcohol use". Codes 3117003, 3117007, 3117009 were used to define "drug use". If a patient had codes for both "alcohol use" and "drug use" they were coded as "alcohol and drug use". NEMSIS codes for not applicable (7701001), not recorded (7701003), none reported (88010015), refused (8801019), and unable to complete (8801023) were used to create the "evidence of substance use not noted" category.

### ***Statistical analysis***

Descriptive analyses for all EMS encounters for injurious falls by location and reported substance use were conducted, and data were cross tabulated by age group and sex. Syncope and heat illness are often causes of injurious falls and alcohol may play a different role in such falls than for falls that occurred without these co-morbidities, and falls without these comorbidities are more likely to be mechanical falls. (7, 37) As such, analyses were also conducted separately for injurious falls that included a notation of syncope, falls that included a notation of heat illness and falls that did not include notations of syncope or heat illness. We conducted all analyses in R Statistical Software (v4.3.1; R Core Team 2023).

## Results

In total 1,854,909 injuries from falls that required an EMS response were identified in the 2019 NEMESIS data. (7) Overall, for 7.4% (n=136,978, see table 1) of injurious falls there was a notation of substance use (alcohol and/or drug use). Notations of alcohol use alone made up 87.8% of the reports of substance use, with a notation of alcohol and drug use comprising 4.3% of reports involving substance use and drug use alone comprising 8.0% of these reports.

For falls that occurred on a street or sidewalk, there was a notation of substance use for 21.2% (n= 27,390) of patients, with alcohol use alone making up 87.4% (n=23,938) of these reports. When injurious falls were separated into falls with a notation of syncope, falls with a notation of heat illness and falls without notation of syncope or heat illness, the overall prevalences of alcohol and/or drug involvement was similar across the three groups (see Table 1). However, for falls occurring on streets and sidewalks, the prevalence of alcohol involvement alone, at 18.8%, was highest for injurious falls without accompanying syncope or heat illness.

Table 2 shows age stratified analyses for falls with a notation of accompanying syncope and Table 3 shows age stratified analyses for falls without accompanying syncope or heat illness (there were not enough falls with a notation of heat illness for meaningful age stratification). Across almost all age groups, for both fall types, the prevalence of alcohol involvement was higher for falls occurring on streets and sidewalks compared to falls occurring indoors. For falls with accompanying syncope, that occurred on streets and sidewalks, adults ages 21-50 and 51-64 had the highest proportion of falls reported to involve alcohol use alone (12.3% and 18.1% respectively). Among those experiencing falls on streets and sidewalks without accompanying syncope or heat illness, these age groups also had the highest proportion of falls reported to involve alcohol (25.3% and 27.7% respectively).

For falls with accompanying syncope and falls without accompanying syncope or heat illness, regardless of location, EMS reports for male patients were more likely to include a report of alcohol and/or drugs than for female patients (see Table 3 and 4). Also for both fall types, the highest prevalences of substance use were found among men for falls occurring on streets and sidewalks. The highest prevalence of alcohol use alone, at 25.1%, was found among men experiencing falls on streets and sidewalks, without accompanying syncope or heat illness.

## Discussion

Overall, 7.4% of all falls requiring EMS response in 2019 involved reported alcohol and/or drug use, while 21.2% of injurious falls occurring on streets or sidewalks involved reported substance use. For all fall types, alcohol use alone was the most frequently reported substance involved in the fall. The prevalence of alcohol involvement for falls that occurred on streets and sidewalks was highest among falls patients who did not have accompanying syncope or heat illness. Falls without an accompanying notation of syncope or heat illness, among adults ages 21-64 and among men were more likely to reportedly involve alcohol alone compared to older adults or youth and women. Falls that occurred on streets or sidewalks were consistently more likely to reportedly involve alcohol across age categories and sexes compared to falls that occurred indoors.

The estimates of the overall prevalence of alcohol and substance use among falls patients presented here are consistent with recent reports using other datasets. Analyses of the 2019–2020 National Hospital Ambulatory Medical Care Survey (NHAMCS) found that 8.4% of fall-related ED visits had indications of alcohol and/or substance use. (38) Analyses of the 2011 to 2020 National Electronic Injury Surveillance System-All Injury Program (NEISS) for patients seeking treatment at EDs found that alcohol involved falls comprised 2.2% of ED visits for falls among patients age 65 and older. (1) This prevalence is consistent with the overall proportion of alcohol involved falls in this age group observed in the NEMESIS data (2.8% for falls without syncope or heat illness). Like prior studies, the analyses of the NHAMCS and NEISS data did not sub-divide falls by location of occurrence and did not separately analyze falls by indications of accompanying syncope and heat illness. (1) Fall injuries that do not have these co-morbidities are more likely to be mechanical falls, for which alcohol consumption, and the resultant loss in coordination, may play a larger role. (37)

These findings suggest that alcohol use is present in a large proportion of falls that occur on streets and sidewalks, particularly among men and adults between the ages of 21 and 64. Falls that occur on streets and sidewalks that involve alcohol may be in close proximity to businesses that serve alcohol. This is consistent with previous findings that suggest a higher density of alcohol serving establishments is associated with both increased alcohol consumption (39) and increased pedestrian injury from motor vehicles. (14, 40-42) Further, the increased prevalence of men and adults ages 21-64 among injurious falls involving alcohol is consistent with the higher prevalence of alcohol consumption in these groups in the US. (14, 43) There are several possible policy options that could be used to address the burden of injurious falls occurring on streets and sidewalks that involve alcohol. (12) Such options include considering appropriate lighting for commercial areas, improved maintenance of sidewalks and curb cuts and improved maintenance of roadbeds at street crossings. (44) States and cities might also re-evaluate policies around nightlife districts and open container laws that encourage the consumption of alcohol while walking. (12, 20, 26) Lastly, it is possible that individuals experiencing homelessness are at risk for experiencing alcohol involved injurious falls in public spaces. (45) If indeed individuals experiencing homelessness do comprise a large proportion of these falls patients, the medical costs of such falls should be factored in to debates on funding homelessness prevention programs.

This is the first study to describe the burden of substance use involved falls occurring on streets and sidewalks from a well-documented national sample. These data are a first step at informing public policies and design strategies aimed at preventing alcohol-involved falls. However, there are also limitations that should be noted. First, we labelled all EMS reports where alcohol or drug use were not noted as “evidence of substance use not noted”, and functionally in our calculations of proportions treated them as indicating an absence of substance use. However, it is unlikely that EMS clinicians’ notations of substance use based on patient’s on-scene reports or physical evidence at the scene is a highly sensitive measure of substance use by patients. Therefore, these positive reports of substance involvement in NEMSIS are likely to be an underestimate of the true prevalence of the involvement of substance use among patients treated for injurious falls. Furthermore, there are likely a large number of additional injurious falls involving alcohol and drugs, where the individuals either do not seek EMS care, perhaps due to stigma surrounding alcohol overconsumption and drug use, or those who seek care directly from a hospital or urgent care facility. Taken together, these limitations likely resulted in an underestimation of the burden of substance use involved pedestrian falls.

In conclusion, this study suggests that a large proportion of falls that occur outdoors on streets and sidewalks and require EMS response involve substance use. Research is needed to assess the link between venues serving alcohol, the built environments around these venues and risk of pedestrian falls and to examine if policies to create nightlife districts lead to an increase in pedestrian falls.

#### **Authors' contributions**

Nicole G. Itzkowitz – conducted data analyses and wrote initial drafts of the manuscript.

Kathryn G. Burford – conducted data analyses and edited and revised the manuscript.

Remle P Crowe – advised on defining falls in NEMSIS, conceptualized the study and wrote and edited portions of the manuscript.

Henry E Wang – advised on defining falls in NEMSIS and on data analyses and edited the manuscript.

Alexander X Lo – advised on defining syncope, heat illness and seizures in the NEMSIS data, helped direct the data analyses and edited the manuscript.

Andrew G. Rundle – conceptualized the study, conducted data analyses to identify patients, advised on data analysis and edited the manuscript.

**Acknowledgements:** National Highway Traffic Safety Administration (NHTSA), National Emergency Medical Services Information System (NEMSIS). The content reproduced from the NEMSIS Database remains the property of the National Highway Traffic Safety Administration (NHTSA). The National Highway Traffic Safety Administration is not responsible for any claims arising from works based on the original Data, Text, Tables, or Figures.

#### **Funding**

AGR is supported by a grant from the National Institute on Alcohol Abuse and Alcoholism (R01AA028552) and the Columbia Center for Injury Science and Prevention, Centers for Disease Control and Prevention (CDC) grant no. R49CE003094. AXL is supported by a grant from the

Davee Foundation (Excellence in Emergency Medicine Grant). KGB and NGI are funded by the National Institute of Environmental Health Sciences (KGB: 5T32ES007322-21; NGI: 5T32ES007322-22).

## References

1. Yuan K, Haddad Y, Law R, Shakya I, Haileyesus T, Navon L, et al. Emergency Department Visits for Alcohol-Associated Falls Among Older Adults in the United States, 2011 to 2020. *Annals of Emergency Medicine*. 2023;82(6):666-77.
2. Shakya I, Bergen G, Haddad YK, Kakara R, Moreland BL. Fall-related emergency department visits involving alcohol among older adults. *Journal of Safety Research*. 2020;74:125-31.
3. Woods C, Jones R, Usher K. The impact of unintentional alcohol-related falls on emergency departments. *Australasian Emergency Care*. 2019;22(1):22-7.
4. Bye EK, Bogstrand ST, Rossow I. The importance of alcohol in elderly's hospital admissions for fall injuries: a population case-control study. *Nordisk Alkohol Nark*. 2022;39(1):38-49.
5. Mukamal KJ, Mittleman MA, Longstreth WT, Jr., Newman AB, Fried LP, Siscovick DS. Self-reported alcohol consumption and falls in older adults: cross-sectional and longitudinal analyses of the cardiovascular health study. *J Am Geriatr Soc*. 2004;52(7):1174-9.
6. Lau G, Ang JY, Kim N, Gabbe BJ, Mitra B, Dietze PM, et al. Prevalence of alcohol and other drug use in patients presenting to hospital for fall-related injuries: a systematic review. *Inj Prev*. 2022;28(4):381-93.
7. Rundle AG, Crowe RP, Wang HE, Lo AX. A methodology for the public health surveillance and epidemiologic analysis of outdoor falls that require an emergency medical services response. *Inj Epidemiol*. 2023;10(1):4.
8. Tinetti ME, Speechley M. Prevention of falls among the elderly. *N Engl J Med*. 1989;320(16):1055-9.
9. Tinetti ME. Prevention of falls and fall injuries in elderly persons: a research agenda. *Prev Med*. 1994;23(5):756-62.
10. Society A.G. S, G., Of, A.A. and On Falls Prevention, O.S.P. Guideline for the prevention of falls in older persons. American Geriatrics Society, British Geriatrics Society, and American Academy of Orthopaedic Surgeons Panel on Falls Prevention. *J Am Geriatr Soc*. 2001;49(5):664-72.
11. Panel on Prevention of Falls in Older Persons AGS, British Geriatrics S. Summary of the Updated American Geriatrics Society/British Geriatrics Society clinical practice guideline for prevention of falls in older persons. *J Am Geriatr Soc*. 2011;59(1):148-57.
12. Wickham M. Alcohol consumption in the night-time economy. London: Greater London Authority; 2012.
13. Timsina LR, Willetts JL, Brennan MJ, Marucci-Wellman H, Lombardi DA, Courtney TK, et al. Circumstances of fall-related injuries by age and gender among community-dwelling adults in the United States. *PLoS ONE*. 2017;12(5):e0176561.
14. DiMaggio C, Mooney S, Frangos S, Wall S. Spatial analysis of the association of alcohol outlets and alcohol-related pedestrian/bicyclist injuries in New York City. *Inj Epidemiol*. 2016;3(1):11.
15. Dultz LA, Frangos S, Foltin G, Marr M, Simon R, Bholat O, et al. Alcohol Use by Pedestrians Who Are Struck by Motor Vehicles: How Drinking Influences Behaviors, Medical Management, and Outcomes. *Journal of Trauma: Injury, Infection & Critical Care*. 2011;71(5):1252-7.

16. National Center for Statistics and Analysis. Pedestrians: 2017 Data. National Highway Traffic Safety Administration; 2019. Report No.: DOT HS 812 375.
17. National Center for Statistics and Analysis. Pedestrians: 2015 data. Washington, DC: National Highway Traffic Safety Administration; 2017. Contract No.: Report DOT HS 812 375.
18. Corben B, Diamantopoulou K, Mullan N, Mainka B. Environmental Countermeasures for Alcohol-related Pedestrian Crashes. Monash University Accident Research Centre; 1996 1996/09//. Report No.: 101.
19. Caulfield J. Urban heartbeat: Entertainment districts are rejuvenating cities and spurring economic growth. *Building Design and Construction*. 2017 2017/09/18/.
20. Pruitt C, Fliss M. Alcohol Social Districts In North Carolina: Evaluation Plans, Feasibility & Recommendations. University of North Carolina, Injury Prevention Research Center; 2023 2023.
21. Spivak J. Cities that Love the Nightlife. *Planning*. 2020.
22. City of New York. NYC's Nightlife Economy: Impact, Assets, and Opportunities. New York City: City of New York; 2019.
23. Strandberg AK, Elgán TH, Feltmann K, Jayaram Lindström N, Gripenberg J. Illicit Drugs in the Nightlife Setting: Changes in Employee Perceptions and Drug Use over a Fifteen-Year Period. *Substance Use & Misuse*. 2020;55(13):2116-28.
24. Palamar JJ, Acosta P, Ompad DC, Cleland CM. Self-Reported Ecstasy/MDMA/"Molly" Use in a Sample of Nightclub and Dance Festival Attendees in New York City. *Subst Use Misuse*. 2017;52(1):82-91.
25. Griffin M, Callander D, Duncan DT, Palamar JJ. Differential Risk for Drug Use by Sexual Minority Status among Electronic Dance Music Party Attendees in New York City. *Subst Use Misuse*. 2020;55(2):230-40.
26. Pennay A, Room R. Prohibiting public drinking in urban public spaces: A review of the evidence. *Drugs: Education, Prevention and Policy*. 2012;19(2):91-101.
27. Morton H. Open Container and Consumption Statutes: National Conference of State Legislatures; 2023 [Available from: <https://www.ncsl.org/financial-services/open-container-and-consumption-statutes>].
28. Yaskewich DM. Local Prohibitions on Marijuana Businesses With On-Site Consumption: Evidence from New York State. *Journal of Drug Issues*. 2022;53(4):602-20.
29. Schauer GL. Cannabis Policy in the United States: Implications for Public Health. *J Natl Cancer Inst Monogr*. 2021;2021(58):39-52.
30. Rotering TL, Lempert LK, Glantz SA. Emerging Indoor Air Laws for Onsite Cannabis Consumption Businesses in the U.S. *Am J Prev Med*. 2021;61(6):e267-e78.
31. Schauer GL, Tynan MA, Marynak K. Self-reported exposure to, perceptions about, and attitudes about public marijuana smoking among US adults, 2018. *Addiction*. 2020;115(7):1320-9.
32. von Kries R, Bolte G, Baghi L, Toschke AM, Group GMES. Parental smoking and childhood obesity--is maternal smoking in pregnancy the critical exposure? *Int J Epidemiol*. 2008;37(1):210-6.
33. Rothman L, Buliung R, Macarthur C, To T, Howard A. Walking and child pedestrian injury: a systematic review of built environment correlates of safe walking. *Injury Prevention: Journal of the International Society for Child and Adolescent Injury Prevention*. 2014;20(1):41-9.

34. U.S. Department of Health and Human Services. Healthy People 2020: Physical Activity Objectives 2014 [Available from: <https://www.healthypeople.gov/2020/topics-objectives/topic/physical-activity/objectives>].
35. Dawson DE. National Emergency Medical Services Information System (NEMSIS). Prehospital Emergency Care. 2009;10(3):314-6.
36. Ehlers J, Fisher B, Peterson S, Dai M, Larkin A, Bradt L, et al. Description of the 2020 NEMSIS Public-Release Research Dataset. Prehospital Emergency Care. 2022;27(4):473-81.
37. Lo AX, Rundle AG. Everyone eventually goes to ground: Distinguishing true syncope from mimics for emergency department studies on syncope in older persons. J Am Coll Emerg Physicians Open. 2022;3(5):e12841.
38. Bhagavathula AS, Aldhaleei WA. Alcohol and Substance Use Among the Working Age Population: A Nationwide Study of Fall-Related Emergency Department Visits. J Stud Alcohol Drugs. 2024.
39. Gruenewald PJ, Ponicki WR, Holder HD. The relationship of outlet densities to alcohol consumption: a time series cross-sectional analysis. Alcohol Clin Exp Res. 1993;17(1):38-47.
40. LaScala EA, Johnson FW, Gruenewald PJ. Neighborhood characteristics of alcohol-related pedestrian injury collisions: a geostatistical analysis. Prev Sci. 2001;2(2):123-34.
41. Sebert Kuhlmann AK, Brett J, Thomas D, Sain SR. Environmental characteristics associated with pedestrian-motor vehicle collisions in Denver, Colorado. Am J Public Health. 2009;99(9):1632-7.
42. Treno AJ, Johnson FW, Remer LG, Gruenewald PJ. The impact of outlet densities on alcohol-related crashes: a spatial panel approach. Accid Anal Prev. 2007;39(5):894-901.
43. White A. Gender Differences in the Epidemiology of Alcohol Use and Related Harms in the United States. ARCR. 2020;40(2):01.
44. FHWA. Lesson 13: Walkways, Sidewalks and Public Spaces [Available from: [https://safety.fhwa.dot.gov/ped\\_bike/univcourse/lesson13.cfm](https://safety.fhwa.dot.gov/ped_bike/univcourse/lesson13.cfm)].
45. Abbs E, Brown R, Guzman D, Kaplan L, Kushel M. Risk Factors for Falls in Older Adults Experiencing Homelessness: Results from the HOPE HOME Cohort Study. Journal of General Internal Medicine. 2020;35(6):1813-20.

**Table 1. Reported Alcohol and Drug Use Among Fall Patients by Location of Fall and by Presence of Syncope and Heat Illness**

| All Injurious Falls                             |                                       |                                          |                                         |                                                             |                                                     |                                                      |
|-------------------------------------------------|---------------------------------------|------------------------------------------|-----------------------------------------|-------------------------------------------------------------|-----------------------------------------------------|------------------------------------------------------|
| Substance Use                                   | Overall<br>N = 1,854,909 <sup>1</sup> | Indoors<br>N =<br>1,596,860 <sup>1</sup> | Not Recorded<br>N = 51,355 <sup>1</sup> | Indoor vs<br>Outdoor<br>Unclear,<br>N = 53,700 <sup>1</sup> | Outdoors –<br>not street<br>N = 23,586 <sup>1</sup> | Street or<br>Sidewalk<br>N =<br>129,408 <sup>1</sup> |
| Alcohol                                         | 120,262<br>(6.5%)                     | 86,950<br>(5.4%)                         | 1,494<br>(2.9%)                         | 6,023<br>(11.2%)                                            | 1,857<br>(7.9%)                                     | 23,938<br>(18.5%)                                    |
| Alcohol<br>and drugs                            | 5,823<br>(0.3%)                       | 4,160<br>(0.3%)                          | 106<br>(0.2%)                           | 245<br>(0.5%)                                               | 107<br>(0.5%)                                       | 1,205<br>(0.9%)                                      |
| Drugs                                           | 10,893<br>(0.6%)                      | 7,814<br>(0.5%)                          | 129<br>(0.3%)                           | 545<br>(1.0%)                                               | 158<br>(0.7%)                                       | 2,247<br>(1.7%)                                      |
| Evidence<br>of<br>substance<br>use not<br>noted | 1,717,931<br>(92.6%)                  | 1,497,936<br>(93.8%)                     | 49,626<br>(96.6%)                       | 46,887<br>(87.3%)                                           | 21,464<br>(91.0%)                                   | 102,018<br>(78.8%)                                   |
| Injurious falls with accompanying syncope       |                                       |                                          |                                         |                                                             |                                                     |                                                      |
|                                                 | Overall<br>N = 73,600 <sup>1</sup>    | Indoors<br>N = 64,325 <sup>1</sup>       | Not Recorded<br>N = 1,402 <sup>1</sup>  | Indoor vs<br>Outdoor<br>Unclear<br>N = 2,351 <sup>1</sup>   | Outdoors -<br>not street<br>N = 800 <sup>1</sup>    | Street or<br>Sidewalk<br>N = 4,722 <sup>1</sup>      |
| Alcohol                                         | 4,818<br>(6.5%)                       | 3,902<br>(6.1%)                          | 65<br>(4.6%)                            | 267<br>(11.4%)                                              | 66<br>(8.3%)                                        | 518<br>(11.0%)                                       |
| Alcohol<br>and drugs                            | 349<br>(0.5%)                         | 286<br>(0.4%)                            | 9<br>(0.6%)                             | 14<br>(0.6%)                                                | 6<br>(0.8%)                                         | 34<br>(0.7%)                                         |
| Drugs                                           | 916<br>(1.2%)                         | 755<br>(1.2%)                            | 12<br>(0.9%)                            | 49<br>(2.1%)                                                | 6<br>(0.8%)                                         | 94<br>(2.0%)                                         |
| Evidence<br>of<br>substance<br>use not<br>noted | 67,517<br>(91.7%)                     | 59,382<br>(92.3%)                        | 1,316<br>(93.9%)                        | 2,021<br>(86.0%)                                            | 722<br>(90.3%)                                      | 4,076<br>(86.3%)                                     |
| Injurious falls with accompanying heat illness  |                                       |                                          |                                         |                                                             |                                                     |                                                      |
|                                                 | Overall<br>N = 9381                   | Indoors<br>N = 6321                      | Not Recorded<br>N = 171                 | Indoor vs<br>Outdoor<br>Unclear<br>N = 421                  | Outdoors -<br>not street<br>N = 541                 | Street or<br>Sidewalk<br>N = 1931                    |

|                                                                     |                                              |                                              |                                                |                                                                     |                                                             |                                                           |
|---------------------------------------------------------------------|----------------------------------------------|----------------------------------------------|------------------------------------------------|---------------------------------------------------------------------|-------------------------------------------------------------|-----------------------------------------------------------|
| Alcohol                                                             | 55<br>(5.9%)                                 | 30<br>(4.7%)                                 | 2<br>(11.8%)                                   | 5<br>(11.9%)                                                        | 3<br>(5.6%)                                                 | 15<br>(7.8%)                                              |
| Alcohol and drugs                                                   | 4<br>(0.4%)                                  | 3<br>(0.5%)                                  | 0<br>(0.0%)                                    | 1<br>(2.4%)                                                         | 0<br>(0.0%)                                                 | 0<br>(0.0%)                                               |
| Drugs                                                               | 13<br>(1.4%)                                 | 6<br>(0.9%)                                  | 0<br>(0.0%)                                    | 1<br>(2.4%)                                                         | 1<br>(1.9%)                                                 | 5<br>(2.6%)                                               |
| Evidence of substance use not noted                                 | 866<br>(92.3%)                               | 593<br>(93.8%)                               | 15<br>(88.2%)                                  | 35<br>(83.3%)                                                       | 50<br>(92.6%)                                               | 173<br>(89.6%)                                            |
| <b>Injurious falls without accompanying syncope or heat illness</b> |                                              |                                              |                                                |                                                                     |                                                             |                                                           |
|                                                                     | <b>Overall<br/>N = 1,780,371<sup>1</sup></b> | <b>Indoors<br/>N = 1,531,903<sup>1</sup></b> | <b>Not Recorded<br/>N = 49,936<sup>1</sup></b> | <b>Indoor vs<br/>Outdoor<br/>Unclear<br/>N = 51,307<sup>1</sup></b> | <b>Outdoors -<br/>not street<br/>N = 22,732<sup>1</sup></b> | <b>Street or<br/>Sidewalk<br/>N = 124,493<sup>1</sup></b> |
| Alcohol                                                             | 115,389<br>(6.5%)                            | 83,018<br>(5.4%)                             | 1,427<br>(2.9%)                                | 5,751<br>(11.2%)                                                    | 1,788<br>(7.9%)                                             | 23,405<br>(18.8%)                                         |
| Alcohol and drugs                                                   | 5,470<br>(0.3%)                              | 3,871<br>(0.3%)                              | 97<br>(0.2%)                                   | 230<br>(0.4%)                                                       | 101<br>(0.4%)                                               | 1,171<br>(0.9%)                                           |
| Drugs                                                               | 9,964<br>(0.6%)                              | 7,053<br>(0.5%)                              | 117<br>(0.2%)                                  | 495<br>(1.0%)                                                       | 151<br>(0.7%)                                               | 2,148<br>(1.7%)                                           |
| Evidence of substance use not noted                                 | 1,649,548<br>(92.7%)                         | 1,437,961<br>(93.9%)                         | 48,295<br>(96.7%)                              | 44,831<br>(87.4%)                                                   | 20,692<br>(91.0%)                                           | 97,769<br>(78.5%)                                         |

<sup>1</sup>n (%)

**Table 2. Substance use by Patient Age and Location, among Falls Patients with Accompanying Syncope**

| Age Group | Substance Use                       | Overall, N = 73,600 <sup>1</sup> | Indoors, N = 64,325 <sup>1</sup> | Not Recorded, N = 1,402 <sup>1</sup> | Indoor vs Outdoor Unclear, N = 2,351 <sup>1</sup> | Outdoors - not street, N = 800 <sup>1</sup> | Street or Sidewalk, N = 4,722 <sup>1</sup> |
|-----------|-------------------------------------|----------------------------------|----------------------------------|--------------------------------------|---------------------------------------------------|---------------------------------------------|--------------------------------------------|
| 0 to 20   |                                     |                                  |                                  |                                      |                                                   |                                             |                                            |
|           | Alcohol                             | 52 (0.8%)                        | 43 (0.8%)                        | 1 (0.8%)                             | 2 (0.6%)                                          | 2 (1.5%)                                    | 4 (0.9%)                                   |
|           | Alcohol and drugs                   | 16 (0.3%)                        | 14 (0.3%)                        | 0 (0.0%)                             | 0 (0.0%)                                          | 1 (0.7%)                                    | 1 (0.2%)                                   |
|           | Drugs                               | 170 (2.7%)                       | 137 (2.6%)                       | 2 (1.7%)                             | 9 (2.9%)                                          | 2 (1.5%)                                    | 20 (4.7%)                                  |
|           | Evidence of substance use not noted | 6,056 (96.2%)                    | 5,110 (96.3%)                    | 118 (97.5%)                          | 297 (96.4%)                                       | 132 (96.4%)                                 | 399 (94.1%)                                |
| 21 to 50  |                                     |                                  |                                  |                                      |                                                   |                                             |                                            |
|           | Alcohol                             | 1,476 (8.5%)                     | 1,133 (7.8%)                     | 21 (7.0%)                            | 103 (15.2%)                                       | 33 (13.6%)                                  | 186 (12.3%)                                |
|           | Alcohol and drugs                   | 192 (1.1%)                       | 152 (1.0%)                       | 6 (2.0%)                             | 8 (1.2%)                                          | 2 (0.8%)                                    | 24 (1.6%)                                  |
|           | Drugs                               | 507 (2.9%)                       | 427 (2.9%)                       | 5 (1.7%)                             | 26 (3.8%)                                         | 4 (1.7%)                                    | 45 (3.0%)                                  |
|           | Evidence of substance use not noted | 15,111 (87.4%)                   | 12,836 (88.2%)                   | 270 (89.4%)                          | 542 (79.8%)                                       | 203 (83.9%)                                 | 1,260 (83.2%)                              |
| 51-64     |                                     |                                  |                                  |                                      |                                                   |                                             |                                            |
|           | Alcohol                             | 1,776 (12.2%)                    | 1,440 (11.5%)                    | 17 (7.0%)                            | 95 (19.3%)                                        | 21 (14.1%)                                  | 203 (18.1%)                                |
|           | Alcohol and drugs                   | 87 (0.6%)                        | 72 (0.6%)                        | 3 (1.2%)                             | 2 (0.4%)                                          | 3 (2.0%)                                    | 7 (0.6%)                                   |

| Age Group    | Substance Use                       | Overall, N = 73,600 <sup>1</sup> | Indoors, N = 64,325 <sup>1</sup> | Not Recorded, N = 1,402 <sup>1</sup> | Indoor vs Outdoor Unclear, N = 2,351 <sup>1</sup> | Outdoors - not street, N = 800 <sup>1</sup> | Street or Sidewalk, N = 4,722 <sup>1</sup> |
|--------------|-------------------------------------|----------------------------------|----------------------------------|--------------------------------------|---------------------------------------------------|---------------------------------------------|--------------------------------------------|
|              | Drugs                               | 154 (1.1%)                       | 123 (1.0%)                       | 1 (0.4%)                             | 11 (2.2%)                                         | 0 (0.0%)                                    | 19 (1.7%)                                  |
|              | Evidence of substance use not noted | 12,536 (86.1%)                   | 10,912 (87.0%)                   | 223 (91.4%)                          | 384 (78.0%)                                       | 125 (83.9%)                                 | 892 (79.6%)                                |
| 65+          |                                     |                                  |                                  |                                      |                                                   |                                             |                                            |
|              | Alcohol                             | 1,503 (4.3%)                     | 1,278 (4.0%)                     | 26 (3.6%)                            | 67 (7.7%)                                         | 10 (3.7%)                                   | 122 (7.5%)                                 |
|              | Alcohol and drugs                   | 54 (0.2%)                        | 48 (0.2%)                        | 0 (0.0%)                             | 4 (0.5%)                                          | 0 (0.0%)                                    | 2 (0.1%)                                   |
|              | Drugs                               | 81 (0.2%)                        | 65 (0.2%)                        | 4 (0.5%)                             | 3 (0.3%)                                          | 0 (0.0%)                                    | 9 (0.6%)                                   |
|              | Evidence of substance use not noted | 33,638 (95.4%)                   | 30,385 (95.6%)                   | 699 (95.9%)                          | 792 (91.5%)                                       | 259 (96.3%)                                 | 1,503 (91.9%)                              |
| Not Reported |                                     |                                  |                                  |                                      |                                                   |                                             |                                            |
|              | Alcohol                             | 11 (5.8%)                        | 8 (5.3%)                         | 0 (0.0%)                             | 0 (0.0%)                                          | 0 (0.0%)                                    | 3 (11.5%)                                  |
|              | Alcohol and drugs                   | 0 (0.0%)                         | 0 (0.0%)                         | 0 (0.0%)                             | 0 (0.0%)                                          | 0 (0.0%)                                    | 0 (0.0%)                                   |
|              | Drugs                               | 4 (2.1%)                         | 3 (2.0%)                         | 0 (0.0%)                             | 0 (0.0%)                                          | 0 (0.0%)                                    | 1 (3.8%)                                   |
|              | Evidence of substance use not noted | 176 (92.1%)                      | 139 (92.7%)                      | 6 (100.0%)                           | 6 (100.0%)                                        | 3 (100.0%)                                  | 22 (84.6%)                                 |

<sup>1</sup>n (%)

**Table 3. Substance use by Patient Age and Location, among Falls Patients without Accompanying Syncope or Heat-Illness**

| Age Group | Substance Use                       | Overall, N = 1,780,371 <sup>1</sup> | Indoors, N = 1,531,903 <sup>1</sup> | Not Recorded, N = 49,936 <sup>1</sup> | Indoor vs Outdoor Unclear, N = 51,307 <sup>1</sup> | Outdoors - not street, N = 22,732 <sup>1</sup> | Street or Sidewalk, N = 124,493 <sup>1</sup> |
|-----------|-------------------------------------|-------------------------------------|-------------------------------------|---------------------------------------|----------------------------------------------------|------------------------------------------------|----------------------------------------------|
| <21       |                                     |                                     |                                     |                                       |                                                    |                                                |                                              |
|           | Alcohol                             | 2,039 (2.0%)                        | 1,332 (1.7%)                        | 26 (1.0%)                             | 130 (1.5%)                                         | 74 (1.1%)                                      | 477 (5.8%)                                   |
|           | Alcohol and drugs                   | 264 (0.3%)                          | 178 (0.2%)                          | 8 (0.3%)                              | 15 (0.2%)                                          | 16 (0.2%)                                      | 47 (0.6%)                                    |
|           | Drugs                               | 718 (0.7%)                          | 486 (0.6%)                          | 18 (0.7%)                             | 54 (0.6%)                                          | 21 (0.3%)                                      | 139 (1.7%)                                   |
|           | Evidence of substance use not noted | 100,948 (97.1%)                     | 76,054 (97.4%)                      | 2,518 (98.0%)                         | 8,327 (97.7%)                                      | 6,493 (98.3%)                                  | 7,556 (91.9%)                                |
| 21 – 50   |                                     |                                     |                                     |                                       |                                                    |                                                |                                              |
|           | Alcohol                             | 38,150 (15.9%)                      | 24,484 (13.9%)                      | 471 (8.2%)                            | 2,455 (18.8%)                                      | 800 (13.4%)                                    | 9,940 (25.3%)                                |
|           | Alcohol and drugs                   | 2,333 (1.0%)                        | 1,449 (0.8%)                        | 44 (0.8%)                             | 130 (1.0%)                                         | 52 (0.9%)                                      | 658 (1.7%)                                   |
|           | Drugs                               | 5,444 (2.3%)                        | 3,469 (2.0%)                        | 58 (1.0%)                             | 279 (2.1%)                                         | 96 (1.6%)                                      | 1,542 (3.9%)                                 |
|           | Evidence of substance use not noted | 193,777 (80.8%)                     | 146,161 (83.3%)                     | 5,157 (90.0%)                         | 10,216 (78.1%)                                     | 5,027 (84.1%)                                  | 27,216 (69.2%)                               |

| Age Group    | Substance Use                       | Overall, N = 1,780,371 <sup>1</sup> | Indoors, N = 1,531,903 <sup>1</sup> | Not Recorded, N = 49,936 <sup>1</sup> | Indoor vs Outdoor Unclear, N = 51,307 <sup>1</sup> | Outdoors - not street, N = 22,732 <sup>1</sup> | Street or Sidewalk, N = 124,493 <sup>1</sup> |
|--------------|-------------------------------------|-------------------------------------|-------------------------------------|---------------------------------------|----------------------------------------------------|------------------------------------------------|----------------------------------------------|
| 51-64        |                                     |                                     |                                     |                                       |                                                    |                                                |                                              |
|              | Alcohol                             | 42,537 (14.4%)                      | 30,207 (12.6%)                      | 467 (6.8%)                            | 2,068 (19.7%)                                      | 590 (14.6%)                                    | 9,205 (27.7%)                                |
|              | Alcohol and drugs                   | 1,562 (0.5%)                        | 1,100 (0.5%)                        | 19 (0.3%)                             | 63 (0.6%)                                          | 26 (0.6%)                                      | 354 (1.1%)                                   |
|              | Drugs                               | 2,094 (0.7%)                        | 1,556 (0.6%)                        | 22 (0.3%)                             | 128 (1.2%)                                         | 28 (0.7%)                                      | 360 (1.1%)                                   |
|              | Evidence of substance use not noted | 248,822 (84.3%)                     | 207,519 (86.3%)                     | 6,347 (92.6%)                         | 8,233 (78.5%)                                      | 3,393 (84.0%)                                  | 23,330 (70.2%)                               |
| 65+          |                                     |                                     |                                     |                                       |                                                    |                                                |                                              |
|              | Alcohol                             | 32,120 (2.8%)                       | 26,653 (2.6%)                       | 454 (1.3%)                            | 1,083 (5.7%)                                       | 313 (5.3%)                                     | 3,617 (8.5%)                                 |
|              | Alcohol and drugs                   | 1,279 (0.1%)                        | 1,121 (0.1%)                        | 26 (0.1%)                             | 22 (0.1%)                                          | 6 (0.1%)                                       | 104 (0.2%)                                   |
|              | Drugs                               | 1,656 (0.1%)                        | 1,507 (0.1%)                        | 18 (0.1%)                             | 34 (0.2%)                                          | 5 (0.1%)                                       | 92 (0.2%)                                    |
|              | Evidence of substance use not noted | 1,093,503 (96.9%)                   | 997,505 (97.1%)                     | 33,826 (98.5%)                        | 17,742 (94.0%)                                     | 5,627 (94.6%)                                  | 38,803 (91.1%)                               |
| Not Reported |                                     |                                     |                                     |                                       |                                                    |                                                |                                              |

| Age Group | Substance Use                       | Overall, N = 1,780,371 <sup>1</sup> | Indoors, N = 1,531,903 <sup>1</sup> | Not Recorded, N = 49,936 <sup>1</sup> | Indoor vs Outdoor Unclear, N = 51,307 <sup>1</sup> | Outdoors - not street, N = 22,732 <sup>1</sup> | Street or Sidewalk, N = 124,493 <sup>1</sup> |
|-----------|-------------------------------------|-------------------------------------|-------------------------------------|---------------------------------------|----------------------------------------------------|------------------------------------------------|----------------------------------------------|
|           | Alcohol                             | 543 (4.1%)                          | 342 (3.1%)                          | 9 (2.0%)                              | 15 (4.6%)                                          | 11 (6.7%)                                      | 166 (15.8%)                                  |
|           | Alcohol and drugs                   | 32 (0.2%)                           | 23 (0.2%)                           | 0 (0.0%)                              | 0 (0.0%)                                           | 1 (0.6%)                                       | 8 (0.8%)                                     |
|           | Drugs                               | 52 (0.4%)                           | 35 (0.3%)                           | 1 (0.2%)                              | 0 (0.0%)                                           | 1 (0.6%)                                       | 15 (1.4%)                                    |
|           | Evidence of substance use not noted | 12,498 (95.2%)                      | 10,722 (96.4%)                      | 447 (97.8%)                           | 313 (95.4%)                                        | 152 (92.1%)                                    | 864 (82.1%)                                  |

<sup>1</sup>n (%)

**Table 4. Substance use by Patient Sex and Location, among Falls Patients with Accompanying Syncope**

| Patient Sex     | Substance Use                                   | Overall<br>N =<br>73,600 <sup>1</sup> | Indoors<br>N =<br>64,325 <sup>1</sup> | Not<br>Recorded<br>N =<br>1,402 <sup>1</sup> | Indoor vs<br>Outdoor<br>Unclear<br>N =<br>2,351 <sup>1</sup> | Outdoors<br>- not<br>street<br>N = 800 <sup>1</sup> | Street or<br>Sidewalk<br>N =<br>4,722 <sup>1</sup> |
|-----------------|-------------------------------------------------|---------------------------------------|---------------------------------------|----------------------------------------------|--------------------------------------------------------------|-----------------------------------------------------|----------------------------------------------------|
| Female          |                                                 |                                       |                                       |                                              |                                                              |                                                     |                                                    |
|                 | Alcohol                                         | 1,519<br>(4.1%)                       | 1,260<br>(3.8%)                       | 21<br>(3.1%)                                 | 86<br>(8.3%)                                                 | 17<br>(4.5%)                                        | 135<br>(6.5%)                                      |
|                 | Alcohol<br>and drugs                            | 115<br>(0.3%)                         | 90<br>(0.3%)                          | 2<br>(0.3%)                                  | 6<br>(0.6%)                                                  | 4<br>(1.0%)                                         | 13<br>(0.6%)                                       |
|                 | Drugs                                           | 361<br>(1.0%)                         | 310<br>(0.9%)                         | 2<br>(0.3%)                                  | 15<br>(1.4%)                                                 | 5<br>(1.3%)                                         | 29<br>(1.4%)                                       |
|                 | Evidence<br>of<br>substance<br>use not<br>noted | 34,959<br>(94.6%)                     | 31,125<br>(94.9%)                     | 648<br>(96.3%)                               | 931<br>(89.7%)                                               | 355<br>(93.2%)                                      | 1,900<br>(91.5%)                                   |
| Male            |                                                 |                                       |                                       |                                              |                                                              |                                                     |                                                    |
|                 | Alcohol                                         | 3,286<br>(9.0%)                       | 2,633<br>(8.4%)                       | 44<br>(6.1%)                                 | 180<br>(13.8%)                                               | 48<br>(11.6%)                                       | 381<br>(14.5%)                                     |
|                 | Alcohol<br>and drugs                            | 234<br>(0.6%)                         | 196<br>(0.6%)                         | 7<br>(1.0%)                                  | 8<br>(0.6%)                                                  | 2<br>(0.5%)                                         | 21<br>(0.8%)                                       |
|                 | Drugs                                           | 553<br>(1.5%)                         | 443<br>(1.4%)                         | 10<br>(1.4%)                                 | 34<br>(2.6%)                                                 | 1<br>(0.2%)                                         | 65<br>(2.5%)                                       |
|                 | Evidence<br>of<br>substance<br>use not<br>noted | 32,355<br>(88.8%)                     | 28,081<br>(89.6%)                     | 661<br>(91.6%)                               | 1,083<br>(83.0%)                                             | 363<br>(87.7%)                                      | 2,167<br>(82.3%)                                   |
| Not<br>Reported |                                                 |                                       |                                       |                                              |                                                              |                                                     |                                                    |

| <b>Patient Sex</b> | <b>Substance Use</b>                | <b>Overall<br/>N =<br/>73,600<sup>1</sup></b> | <b>Indoors<br/>N =<br/>64,325<sup>1</sup></b> | <b>Not Recorded<br/>N =<br/>1,402<sup>1</sup></b> | <b>Indoor vs Outdoor Unclear<br/>N =<br/>2,351<sup>1</sup></b> | <b>Outdoors - not street<br/>N = 800<sup>1</sup></b> | <b>Street or Sidewalk<br/>N =<br/>4,722<sup>1</sup></b> |
|--------------------|-------------------------------------|-----------------------------------------------|-----------------------------------------------|---------------------------------------------------|----------------------------------------------------------------|------------------------------------------------------|---------------------------------------------------------|
|                    | Alcohol                             | 13<br>(6.0%)                                  | 9<br>(4.8%)                                   | 0<br>(0.0%)                                       | 1<br>(12.5%)                                                   | 1<br>(20.0%)                                         | 2<br>(18.2%)                                            |
|                    | Alcohol and drugs                   | 0<br>(0.0%)                                   | 0<br>(0.0%)                                   | 0<br>(0.0%)                                       | 0<br>(0.0%)                                                    | 0<br>(0.0%)                                          | 0<br>(0.0%)                                             |
|                    | Drugs                               | 2<br>(0.9%)                                   | 2<br>(1.1%)                                   | 0<br>(0.0%)                                       | 0<br>(0.0%)                                                    | 0<br>(0.0%)                                          | 0<br>(0.0%)                                             |
|                    | Evidence of substance use not noted | 203<br>(93.1%)                                | 176<br>(94.1%)                                | 7<br>(100.0%)                                     | 7<br>(87.5%)                                                   | 4<br>(80.0%)                                         | 9<br>(81.8%)                                            |

<sup>1</sup>n (%)

**Table 5. Substance use by Patient Sex and Location, among Falls Patients without Accompanying Syncope or Heat-Illness**

| Sex          | Substance Use                       | Overall<br>N =<br>1,780,371 <sup>1</sup> | Indoors<br>N =<br>1,531,903 <sup>1</sup> | Not Recorded<br>N =<br>49,936 <sup>1</sup> | Indoor vs Outdoor<br>Unclear<br>N =<br>51,307 <sup>1</sup> | Outdoors - not street<br>N =<br>22,732 <sup>1</sup> | Street or Sidewalk<br>N =<br>124,493 <sup>1</sup> |
|--------------|-------------------------------------|------------------------------------------|------------------------------------------|--------------------------------------------|------------------------------------------------------------|-----------------------------------------------------|---------------------------------------------------|
| Female       |                                     |                                          |                                          |                                            |                                                            |                                                     |                                                   |
|              | Alcohol                             | 38,742<br>(3.8%)                         | 30,677<br>(3.4%)                         | 511<br>(1.8%)                              | 1,761<br>(6.9%)                                            | 554<br>(5.2%)                                       | 5,239<br>(10.1%)                                  |
|              | Alcohol and drugs                   | 1,915<br>(0.2%)                          | 1,543<br>(0.2%)                          | 33<br>(0.1%)                               | 59<br>(0.2%)                                               | 26<br>(0.2%)                                        | 254<br>(0.5%)                                     |
|              | Drugs                               | 3,589<br>(0.3%)                          | 2,872<br>(0.3%)                          | 46<br>(0.2%)                               | 131<br>(0.5%)                                              | 38<br>(0.4%)                                        | 502<br>(1.0%)                                     |
|              | Evidence of substance use not noted | 985,895<br>(95.7%)                       | 878,008<br>(96.2%)                       | 28,371<br>(98.0%)                          | 23,524<br>(92.3%)                                          | 10,047<br>(94.2%)                                   | 45,945<br>(88.5%)                                 |
| Male         |                                     |                                          |                                          |                                            |                                                            |                                                     |                                                   |
|              | Alcohol                             | 76,253<br>(10.3%)                        | 52,051<br>(8.5%)                         | 911<br>(4.4%)                              | 3,973<br>(15.5%)                                           | 1,228<br>(10.3%)                                    | 18,090<br>(25.1%)                                 |
|              | Alcohol and drugs                   | 3,543<br>(0.5%)                          | 2,321<br>(0.4%)                          | 64<br>(0.3%)                               | 171<br>(0.7%)                                              | 74<br>(0.6%)                                        | 913<br>(1.3%)                                     |
|              | Drugs                               | 6,329<br>(0.9%)                          | 4,153<br>(0.7%)                          | 71<br>(0.3%)                               | 364<br>(1.4%)                                              | 111<br>(0.9%)                                       | 1,630<br>(2.3%)                                   |
|              | Evidence of substance use not noted | 656,868<br>(88.4%)                       | 554,457<br>(90.5%)                       | 19,442<br>(94.9%)                          | 21,107<br>(82.4%)                                          | 10,553<br>(88.2%)                                   | 51,309<br>(71.3%)                                 |
| Not Reported |                                     |                                          |                                          |                                            |                                                            |                                                     |                                                   |
|              | Alcohol                             | 394<br>(5.4%)                            | 290<br>(5.0%)                            | 5<br>(1.0%)                                | 17<br>(7.8%)                                               | 6<br>(5.9%)                                         | 76<br>(12.4%)                                     |

| Sex | Substance Use                       | Overall<br>N =<br>1,780,371 <sup>1</sup> | Indoors<br>N =<br>1,531,903 <sup>1</sup> | Not Recorded<br>N =<br>49,936 <sup>1</sup> | Indoor vs Outdoor<br>Unclear<br>N =<br>51,307 <sup>1</sup> | Outdoors - not street<br>N =<br>22,732 <sup>1</sup> | Street or Sidewalk<br>N =<br>124,493 <sup>1</sup> |
|-----|-------------------------------------|------------------------------------------|------------------------------------------|--------------------------------------------|------------------------------------------------------------|-----------------------------------------------------|---------------------------------------------------|
|     | Alcohol and drugs                   | 12<br>(0.2%)                             | 7<br>(0.1%)                              | 0<br>(0.0%)                                | 0<br>(0.0%)                                                | 1<br>(1.0%)                                         | 4<br>(0.7%)                                       |
|     | Drugs                               | 46<br>(0.6%)                             | 28<br>(0.5%)                             | 0<br>(0.0%)                                | 0<br>(0.0%)                                                | 2<br>(2.0%)                                         | 16<br>(2.6%)                                      |
|     | Evidence of substance use not noted | 6,785<br>(93.8%)                         | 5,496<br>(94.4%)                         | 482<br>(99.0%)                             | 200<br>(92.2%)                                             | 92<br>(91.1%)                                       | 515<br>(84.3%)                                    |

<sup>1</sup>n (%)
